# Supplementary material for: Dolaflexin: A Novel Antibody–Drug Conjugate Platform Featuring High Drug Loading and a Controlled Bystander Effect
Source: Oxford University Press journal article supplement (doi:10.1158/1535-7163.mct-20-0166), 2021-03-15
Supplement: 15357163mct200166-sup-238319_4_supp_6935148_q11sn2.docx [file 15357163mct200166-sup-238319_4_supp_6935148_q11sn2.docx]

**Supplementary Information**

**Preparation of Dolaflexin**

***Poly-1-hydroxymethylethylene hydroxymethyl-formal (1)***The PHF or Fleximer® backbone was prepared as previously described. (Yurkovetskiy, et al., 2013)

***PHF-carbamylpropanoic acid (2)***

PHF(10K) (13.00 g, 97 mmol) was dissolved in DMA (96 mL) by stirring at 45-50°C until a homogeneous solution was obtained. ~ 40% of DMA was evaporated under vacuum and DMA was added to reach a final solution volume of 86 mL. Pyridine (15.33 g, 194 mmol) was added followed by portion wise addition of ethyl 3-isocyanatopropionate (4.58 g, 32.0 mmol). The reaction mixture was kept under stirring 18 hours at 55-58°C. The reaction mixture was cooled to ~30°C and was added to a stirred solution of 0.5 N NaOH (500 g). The reaction mixture was kept at 25°C with stirring for 24 hours. The pH of the final reaction mixture was 13. The pH of the reaction mixture was adjusted to 6.6 using 1N HCl. The mixture was diluted with deionized water to a final volume of 1.2 L. The crude product was purified on a Sephadex® G-25 column (3 x 400 mL injections). Fractions containing pure product were lyophilized to afford 16g product. The product was dissolved in 1.0L DI water and squeezed though a Pellicon XL Ultrafiltration Module Biomax 8 kDa. The filtrate was pressure filtered through a Pellicon XL Ultrafiltration Module Biomax 5 kDa and the resulting filtrate was filtered through a 3 kDa filter to afford the final product that was lyophilized to afford 4.9 g product as a solid.

***Maleimido-PHF-carbamylpropanoic acid (4)***

To a solution of PHF-carbamylpropanoic acid (**2**) (30% in deionized water) (1000 mg, 6.03 mmol) was added a solution of **3** (154 mg, 0.329 mmol) in acetonitrile (4 mL) while maintaining the temperature between 5-10 °C. N-hydroxysuccinimide (54.1 mg, 0.47 mmol) was added to the reaction mixture followed by addition of EDC HCl (231 mg, 1.21 mmol) in two equal portions 1 hour apart. Upon completion of reagent addition the pH of the reaction mixture was 5.6. The reaction mixture was kept under stirring for 4 hours at 5-10 °C. NaCl (0.75g) was added and the reaction mixture was cooled to 5°C and kept still for 5h, pH was adjusted to 5.3 and the reaction mixture was kept at 5°C overnight. The crude product mixture was purified on a 2"x16" Sephadex® G-25 column using deionized water as eluent (2 x 80 mL injections). Fractions containing pure product were pooled and were concentrated using a 3 kDa MWCO membrane to a final volume of 50 mL. The product solution was filtered through a 0.2 μm filter and the filtrate was lyophilized to afford 0.95g of **4**  as a white solid (86% based on **2**).

***Dolaflexin (6)***

To a solution of **4** (1.08 g, 0.108 mmol) in water (11 mL) and NMP (6.00 mL) was added Auristatin F-HPA-Ala 2 TFA **5** (667.6 mg, 0.583 mmol). The mixture was cooled to 0 C and a solution of 1-hydroxypyrrolidine-2,5-dione (0.139 g, 1.21 mmol) in 1.0 mL water was added. A solution of EDC-HCl (0.464 g, 2.420 mmol) in water (4 mL) was added in two portions over one hour and the pH adjusted to 5.6 with 0.1N NaHCO3. After the addition of the EDC-HCl was complete, stirring was continued for 18 hours at room temperature at which time RP-HPLC analysis indicated the reaction to be incomplete. The solution was cooled to 0 C and the pH adjusted to 5.0 with 0.1N NaHCO3. EDC-HCl (0.600 mg, 3.13 mmol) was added in two portions over 3 hours and the mixture was stirred for an additional 2 hours. NaCl (0.540 mg) was added and the mixture was stirred for 30 minutes. The sample was diluted to a volume of 150 mL with water, the pH was adjusted to 5.0 and the was sample purified with a Sephadex G25 column. The crude was concentrated by dialysis through a 3K regenerated cellulose membrane. The concentrated material was subjected to RP HPLC purification eluting with Sodium Acetate buffer, pH 5.8. The pH was adjusted to 5.0 with 0.1N Acetic Acid. Selected fractions based on 1H-NMR and SEC analysis containing 6-10% AF-HPA and 7-13 kDa SEC-MW were pooled together to afford Dolaflexin **6** (1.75g, 39% yield).

***Analytical Ultracentifugation to Determine Level of Aggregation of Dolaflexin ADC***

To determine monomeric state, SV-AUC of the Dolaflexin ADC was carried out in an Optima XLA/I AUC (Beckman Coulter) following standard procedures described previously.* Sample and buffer (400 uL each) was loaded in the sample and reference sector of a 12 mm Epon double-sector centerpieces, inserted in a 4-hole rotor and, after temperature equilibration at 19°C for 2 hours, accelerated to 60,000 rpm.Data acquisition with Rayleigh interference and absorbance at 280 nm was commenced in 1 min intervals. Data analysis was carried out in SEDFIT using the *c*(*s*) model as described in detail previously.# The Dolaflexin ADC was determined to be 95% monomeric, 5% dimeric.

(*) Zhao H, Brautigam CA, Ghirlando R., Schuck P. Overview of current methods in sedimentation velocity and sedimentation equilibrium analytical ultracentrifugation. Curr Protoc Protein Sci. 2013;7(71):20.12.1

(#) Schuck P. Sedimentation velocity analytical ultracentrifugation: discrete species and size-distributions of macromolecules and particles. Boca Raton (FL): CRC Press; 2016.

**Bystander Effect Study Methods**

Two cancer cell lines were co-cultured: the HER2 positive cell line, NCI-N87 (labeled with NucLightGreen, Cat#4624), and HER2 negative cell line MDA-MB-231 (labeled with NucLightRed, Cat#4625). For the assay, the cell lines were cultured alone or mixed at the optimized ratio of 3:1 (3 NCI-N87 : 1 MDA-MB-231), with total 3,000 cells per well of a 96-well plate in 100 µl of media, and allowed to attach overnight at 37° C in the presence of 5% CO2. The optimal ratio of 3:1 was found to yield comparable confluence of both cell lines by the end of the experiment and thus the most robust quantitation of cytotoxicity, and is consistent with the literature (John Y Li et al. Cancer Cell 29, 117–129, January 11, 2016).

The cells were treated with targeted ADC (trastuzumab-Dolaflexin) or non-binding control ADC (Rituximab-Dolaflexin) at a range of concentrations for one hour on ice, and then washed. Then the cells were incubated under normal culture conditions to allow targeted ADC to internalize via target mediated endocytosis, traffic to the lysosome and release the active toxin (auristatin F-HPA). The cells were incubated for 3 days at 37° in the presence of 5% CO2 in an IncucyteZoom (Essen Bioscience) for monitoring phase contrast, red and green fluorescence. Each well was photographed every 6 hours.

Cytotoxicity is indicated by a reduction in the confluency, which is the quantitative measure of the fluorescent area. The IC50 values cannot be compared to those from the standard cytotoxicity studies (Supplementary Table S1) because the ADC exposure in the bystander studies was 1 hour, compared to 72 hours for the standard experiment. The Incucyte provides a relative measurement of how many of cells of each cell line are present in the culture at a given time point by calculating the area of a field of view covered by fluorescent objects of each color. The % Confluency was quantified in the IncuCyte using the on-board software which enables accurate quantification of the area occupied by NucLightGreen or NucLightRed cells over time. The actual values for confluency are described in Figure S3.

Each of the bystander effect experiments (including control treatments) was conducted at least three times, and the results were comparable.


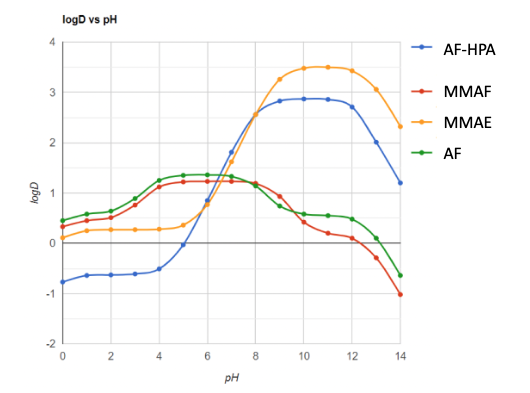


**Supplementary Figure S1.**  Calculated logD vs. pH for AF-HPA, AF, MMAE and MMAF


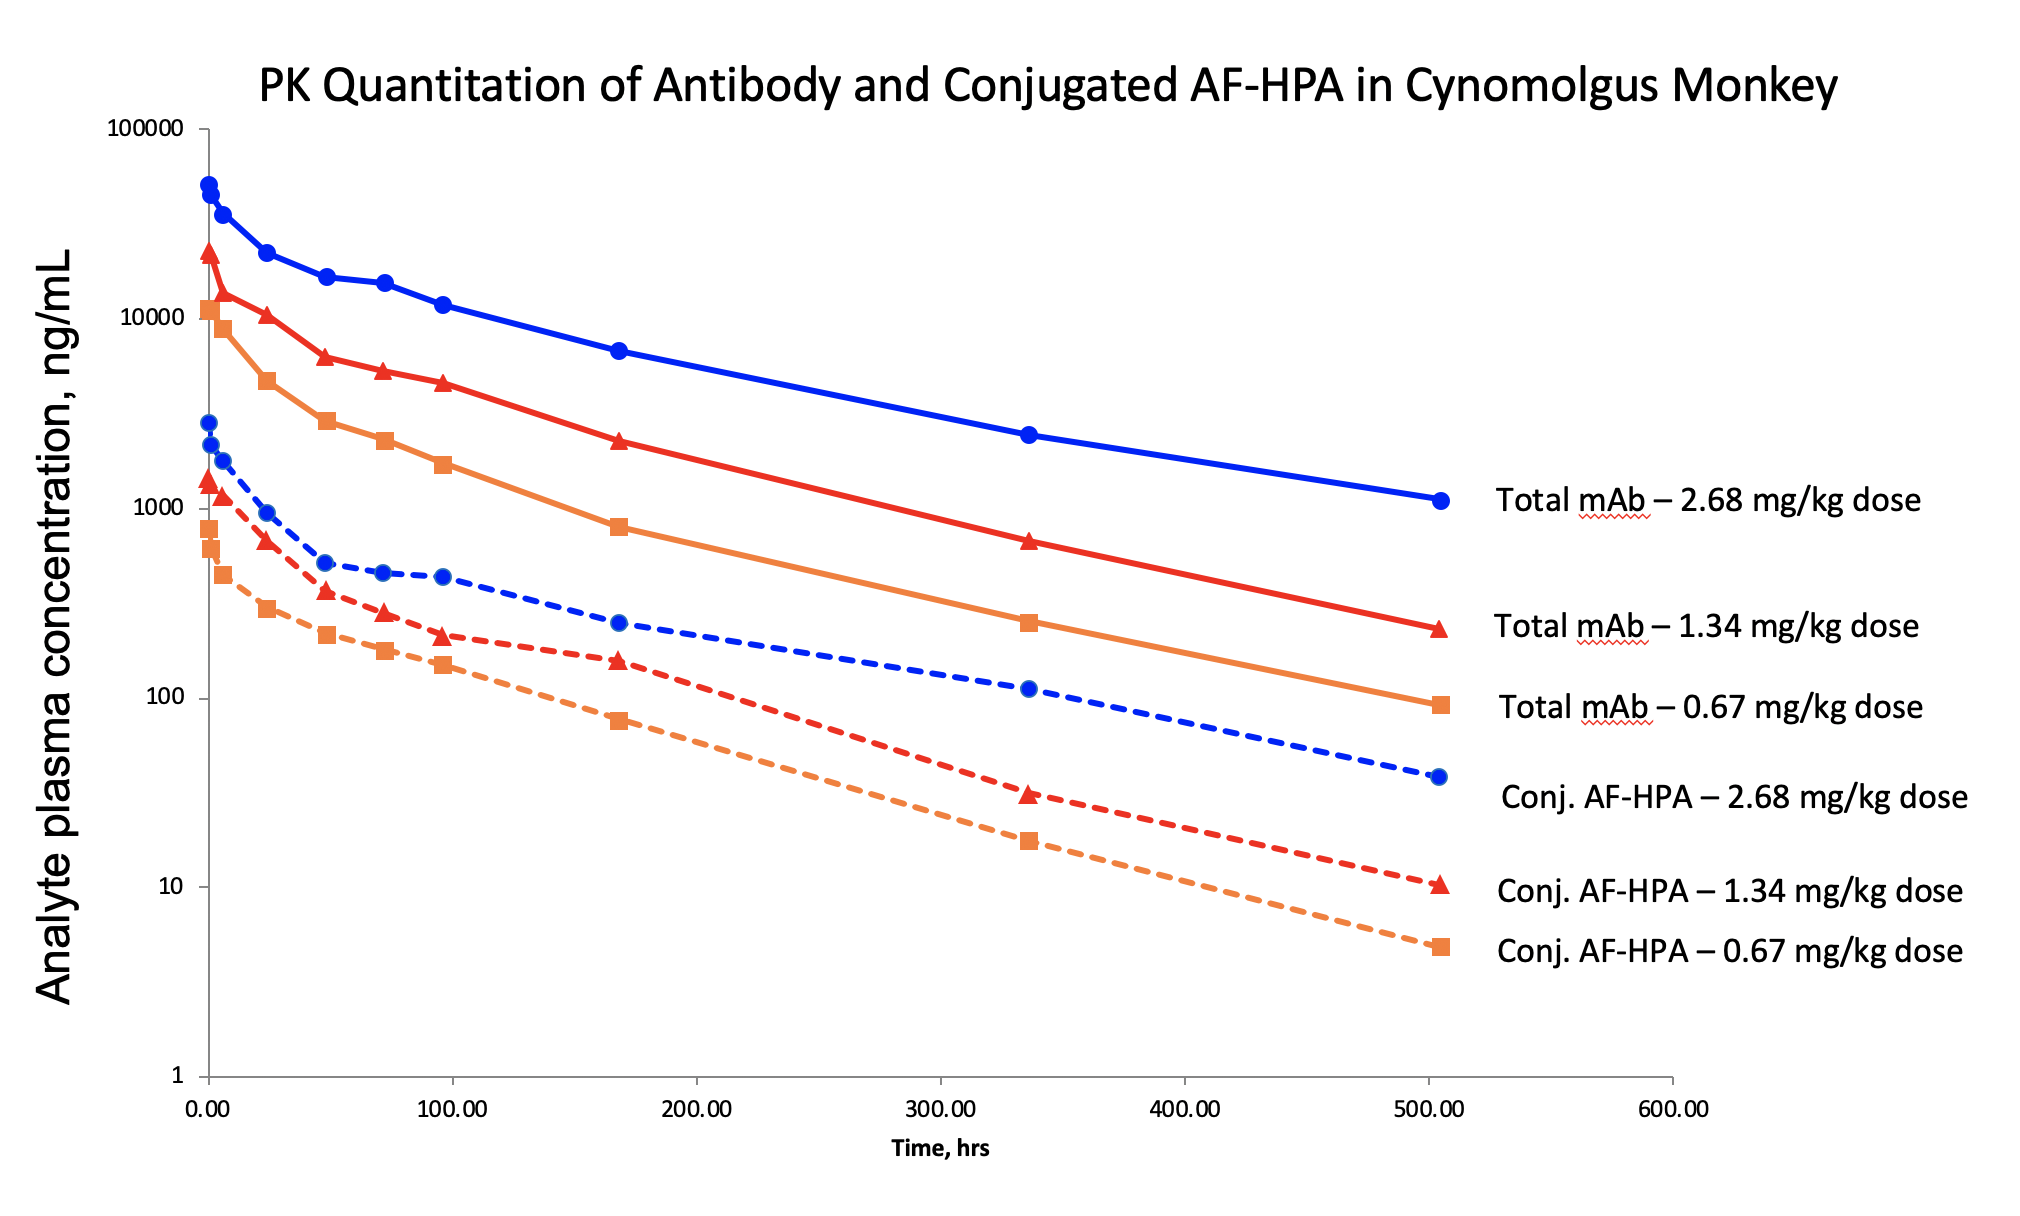


**Supplementary Figure S2.**  Total antibody and conjugated AF-HPA quantitation dose response after single dose to cynomolgus monkeys.

**Supplementary Figure S3.** Additional Information on the Bystander Effect Studies.

A, The quantitation for “% confluence” reflects a large dynamic range. Top panel: image of MDA-MB-231 + NCI-N87 culture before treatment with Trastuzumab-Dolaflexin corresponds to 20% red confluence, because (1) the NucLightRed signal reflects nuclear and not cytoplasmic area; (2) some space is taken by green cells, and (3) other space is left available for cell proliferation during the course of the experiment. Bottom panel: image following 50 nM Trastuzumab-Dolaflexin treatment corresponds to 5% red confluence which represents cellular debris.

B, The non-binding control ADC (rituximab-Dolaflexin) does not induce appreciable cytotoxic effects on either the MDA-MB-231 cells or the MDA-MB-231 + NCI-N87 co-culture.

C, Comparable cytotoxic effects of Trastuzumab-Dolaflexin on NCI-N87 (green) cells regardless of whether the cells are cultured alone (IC50 = 0.67 nM) or in co-culture with MDA-MB-231 (IC50 = 0.5 nM).

**
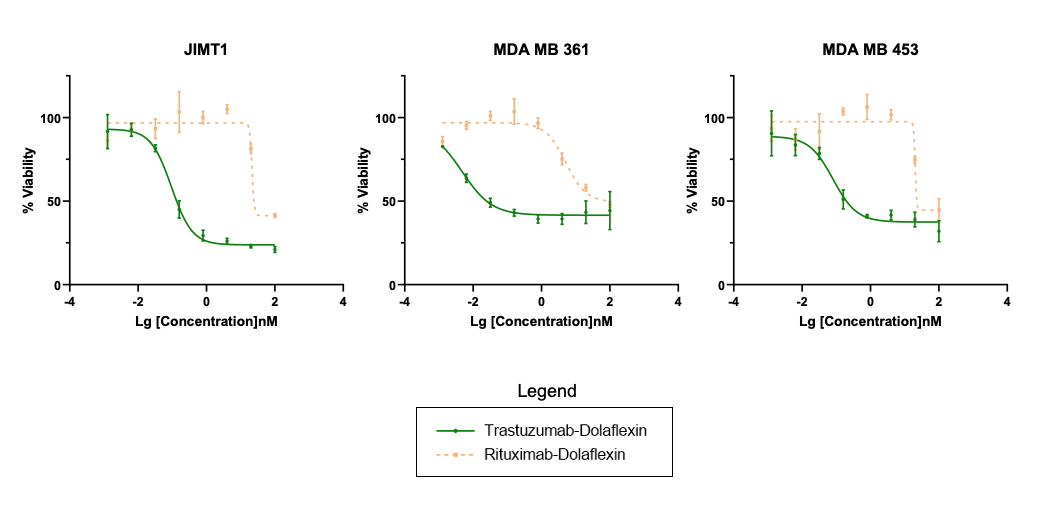
**

**Supplementary Figure S4.** The non-binding Dolaflexin control ADC rituximab-Dolaflexin is typically ~1,000x less potent than the targeted trastuzumab-Dolaflexin ADC in Her2-expressing cell lines.

**Supplementary Table S1.** Cytotoxicity of trastuzumab-Dolaflexin.

| **Tumor type** | **Cell line** | **HER2 amplification** | **HER2 receptors /cell** | **IC50, nM** | | **Fold Potency increase** |
| --- | --- | --- | --- | --- | --- | --- |
| **Trastuzumab-Dolaflexin** | **T-DM1** |
| Breast | MDA-MB-361 | + | 135,000 | 0.001 | 0.33 | 330 |
| MDA-MB-453 | + | 125,000 | 0.08 | 100 | 1250 |
| JIMT-1 | + | 80,000 | 0.14 | 20 | 143 |
| BT483* | - | 60,000 | 17 | 100 | >6 |
| MDA-MB-175 | - | 50,000 | 0.6 | 100 | >166 |
| CAMA-1 | - | 50,000 | 0.05 | 15 | 300 |
| ZR-75-1* | - | 40,000 | 1.1 | 100 | 91 |
| HCC1187 | - | 38,000 | 0.7 | 22 | 31 |
| HCC38 | - | 36,000 | 0.8 | 100 | >125 |
| T47D* | - | 20,000 | 8.2 | 100 | 12 |
| BT20 | - | 18,000 | 10.5 | 81 | 8 |
| HCC70* | - | 10,000 | 4.64 | 100 | 22 |
| MDA-MB-231 | - | 5,400 | 17 | 30 | 2 |
| HCC1806 | - | 5,200 | 1.4 | 8.2 | 6 |
| Lung | NCI-H2170 | + | 660,000 | 0.1 | 0.34 | 3 |
| Calu3* | + | 340,000 | 0.4 | 100 | >250 |
| NCI-522 | - | 25,000 | 0.06 | 100 | 1667 |
| NCI-H1581 | - | 13,000 | 2.3 | 100 | 43 |
| NCI-H1975* | - | 13,000 | 5.1 | 100 | 20 |
| NCI-H2122 | - | 12,000 | 0.3 | 11 | 37 |
| DMS-114 | - | 12,000 | 18 | 100 | >6 |
| NCI-H292* | - | 12,000 | 3.9 | 11.6 | 3 |
| NCI-H1781 | - | 8,600 | 2.7 | 16.3 | 6 |
| A549 | - | 6000 | 20 | 100 | >5 |
| NCI-H460 | - | 4,000 | 26 | 94 | 4 |
| Ovarian | SKOV3 | + | 220,000 | 0.19 | 5.6 | 29 |
| TOV-21G* | - | 12,000 | 8.8 | 31 | 4 |
| OVCAR3 | - | 7,200 | 3.7 | 26 | 7 |
| Gastric | NCI-N87 | + | 870,000 | 0.03 | 0.3 | 10 |
| SNU-5 | - | 22,000 | 8.8 | 100 | >11 |
| KATO III* | - | 19,000 | 13.2 | 100 | >8 |
| MKN45* | - | 16,000 | 11.4 | 100 | >9 |

*These cell lines were incubated with drug for 6 days instead of 3, to account for their slower proliferation rate.

**Supplementary Table S2.** Half life of conjugated AF-HPA in a representative Dolaflexin ADC.

| Matrix | Half life (hours) |
| --- | --- |
| 0.5M PBS | 182 |
| Mouse plasma | 231 |
| Rat plasma | 347 |
| Monkey plasma | 338 |
| Human plasma | 277 |

*note: the apparent shorter half-life in PBS relative to plasma is not believed to reflect lower stability in this matrix, but rather loss of material due to non-specific binding in the sample tube with this matrix

**Method for Determination of Stability of trastuzumab-Dolaflexin:**

Trastuzumab-Dolaflexin was added to buffered plasma, with 0.5 M phosphate buffer pH 7.4 added to plasma at a ratio of 1:3 to achieve a concentration of conjugated AF-HPA of 10,000 ng/mL. The samples were incubated at 37 0C with mild shaking. A volume of 40 μL sample was taken from each plasma sample at the appropriate timepoints and diluted with 160 μL of acetonitrile containing 500 ng/mL d6-AF HPA internal standard. The free AF-HPA as well as free AF were calibrated with a standard curve including a mixture of trastuzumab-Dolaflexin and AF-HPA which ranged from 25 to 10,000 ng/mL prepared in the same plasma matrix. The total free AF-HPA and free AF was subtracted from the total spiked equivalent (10,000 ng/mL) of AF-HPA to obtain the remaining conjugated drug concentration of AF-HPA at each time point. The slope of the plot of conjugated drug concentration of AF-HPA vs. time was determined for half life calculation.

**Supplementary Table S3.** P-GP substrate assessment using Caco-2 monolayers.

| Test article | Direction | Recovery  (%) | Efflux  ratio | Pgp  substrate classification |
| --- | --- | --- | --- | --- |
| AF | A-to-B | 100 | 1.8 | Negative |
|  | B-to-A | 103 |  |  |
| AF  + 1μM Valspodar | A-to-B | 102 | 1.4 |  |
|  | B-to-A | 109 |  |  |
| AF-HPA | A-to-B | 91 | 32 | Positive |
|  | B-to-A | 97 |  |  |
| AF-HPA  + 1μM Valspodar | A-to-B | 89 | 4.7 |  |
|  | B-to-A | 100 |  |  |
| Digoxin | A-to-B | 88 | 20 | Positive |
|  | B-to-A | 97 |  |  |
| Digoxin  + 1μM Valspodar | A-to-B | 88 | 1.0 |  |
|  | B-to-A | 106 |  |  |
